# Supplementary material for: Neoadjuvant Radiotherapy for Rectal Cancer: Meta-analysis of Randomized Controlled Trials
Source: Springer Nature journal article supplement (doi:10.1245/s10434-013-3198-9), 2013-09-03
Supplement: 10434_2013_3198_MOESM1_ESM.pdf [file 10434_2013_3198_MOESM1_ESM.pdf]

## Evaluation of publication bias

Presence of publication bias was evaluated using Funnel plot analyses.<sup>1,2</sup>

Neoadjuvant therapy vs. surgery alone:

*Overall survival*

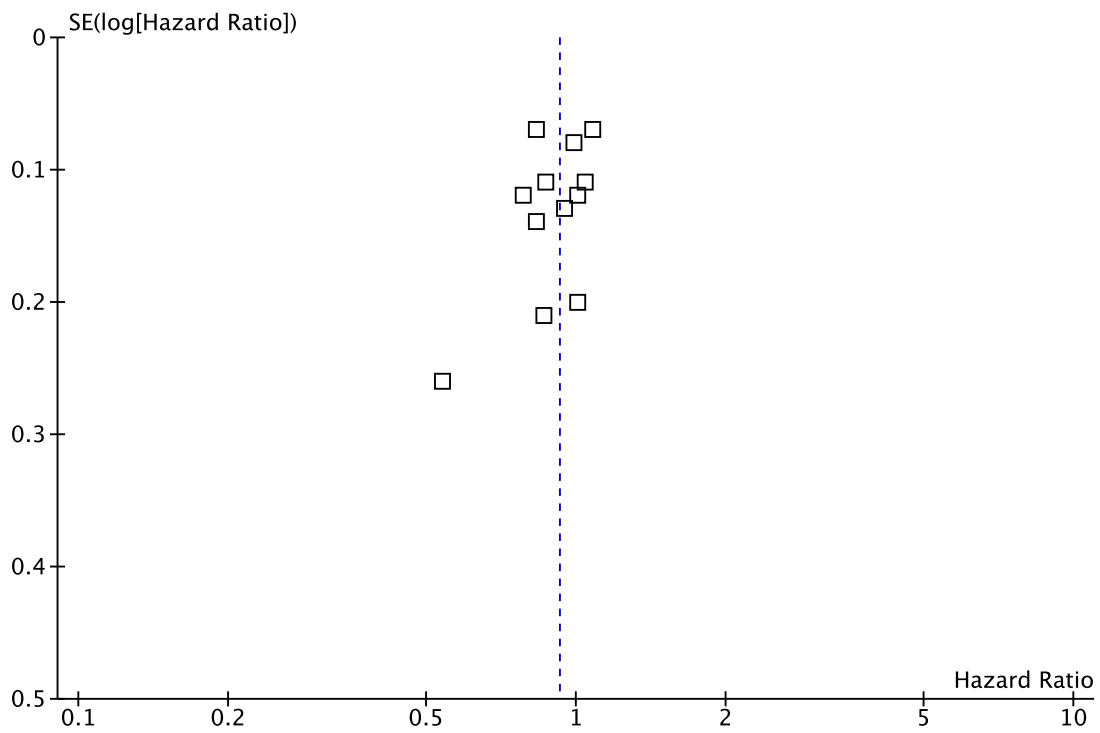

*Disease-specific survival*

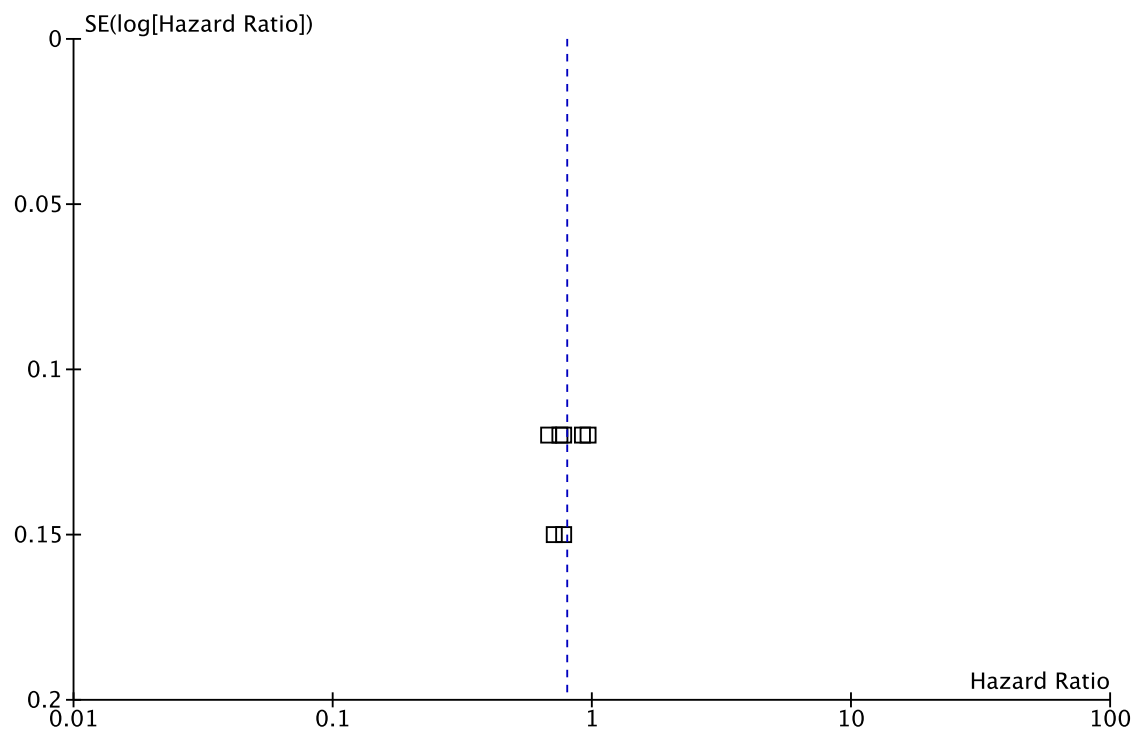

*Disease-free survival*

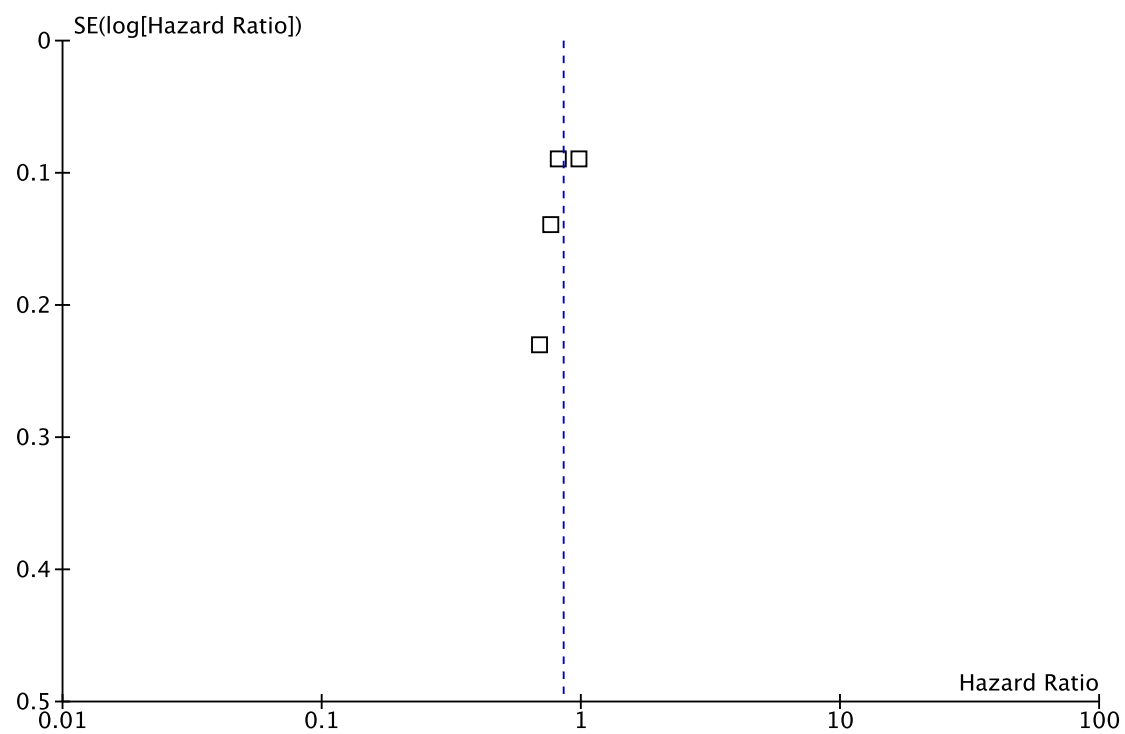

*Local recurrence-free survival*

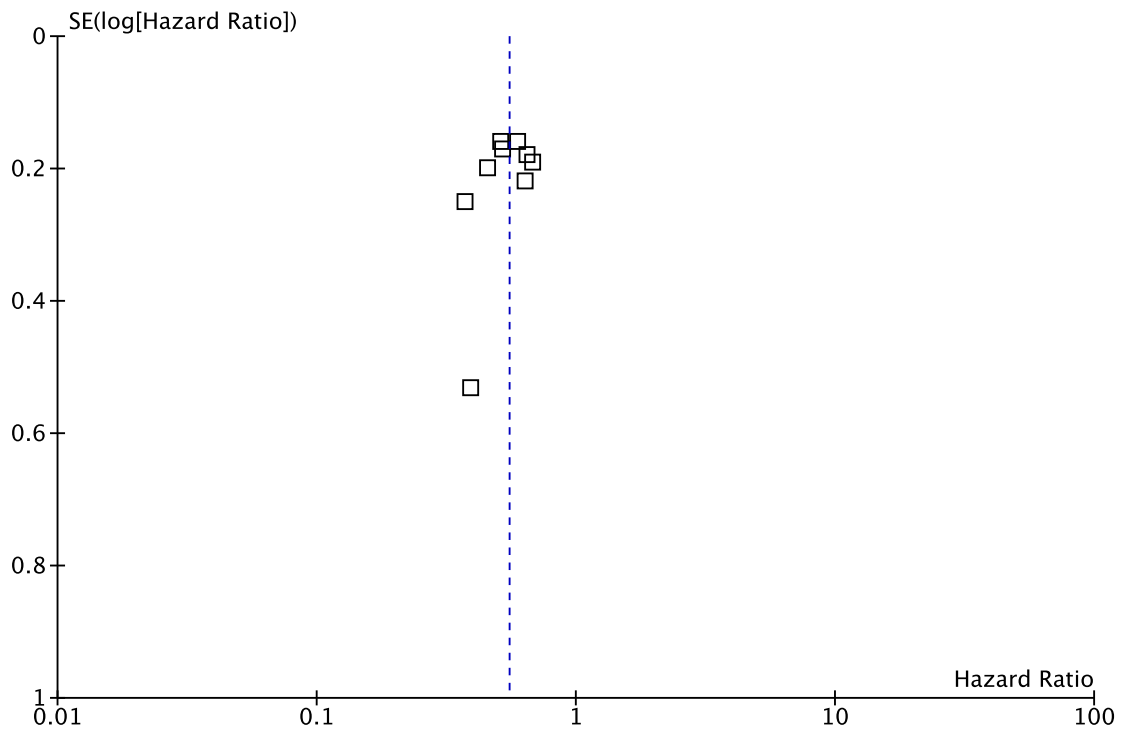

*Perioperative mortality*

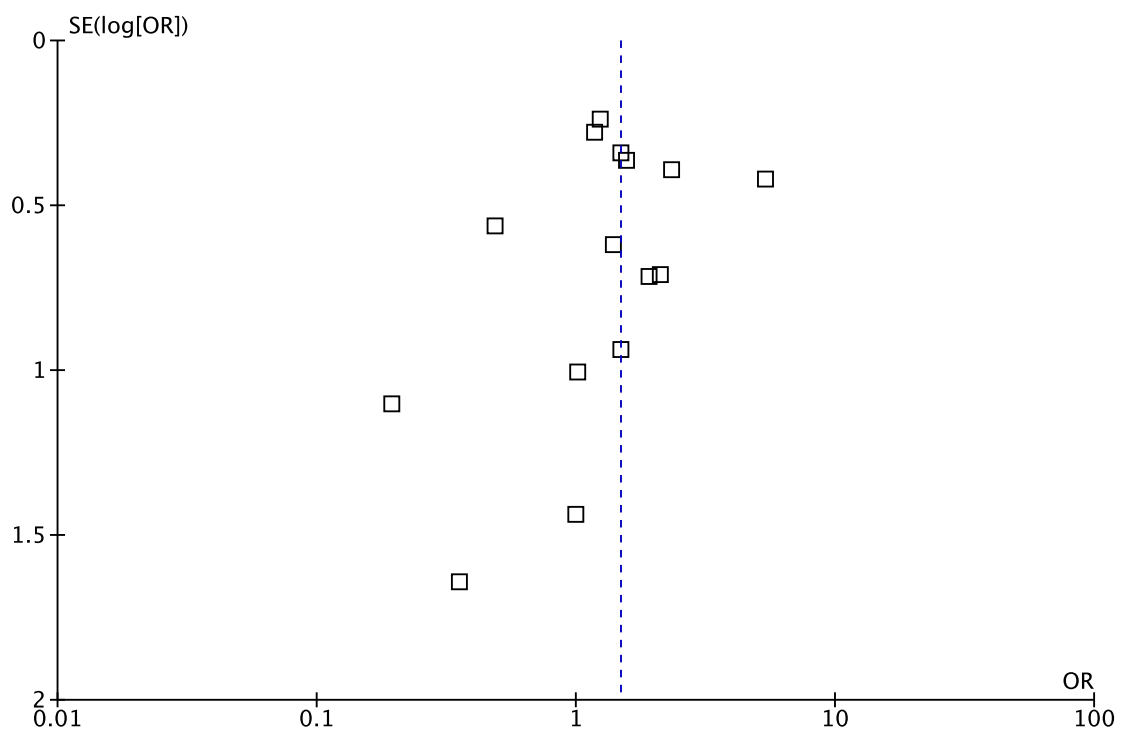

*Perioperative morbidity*

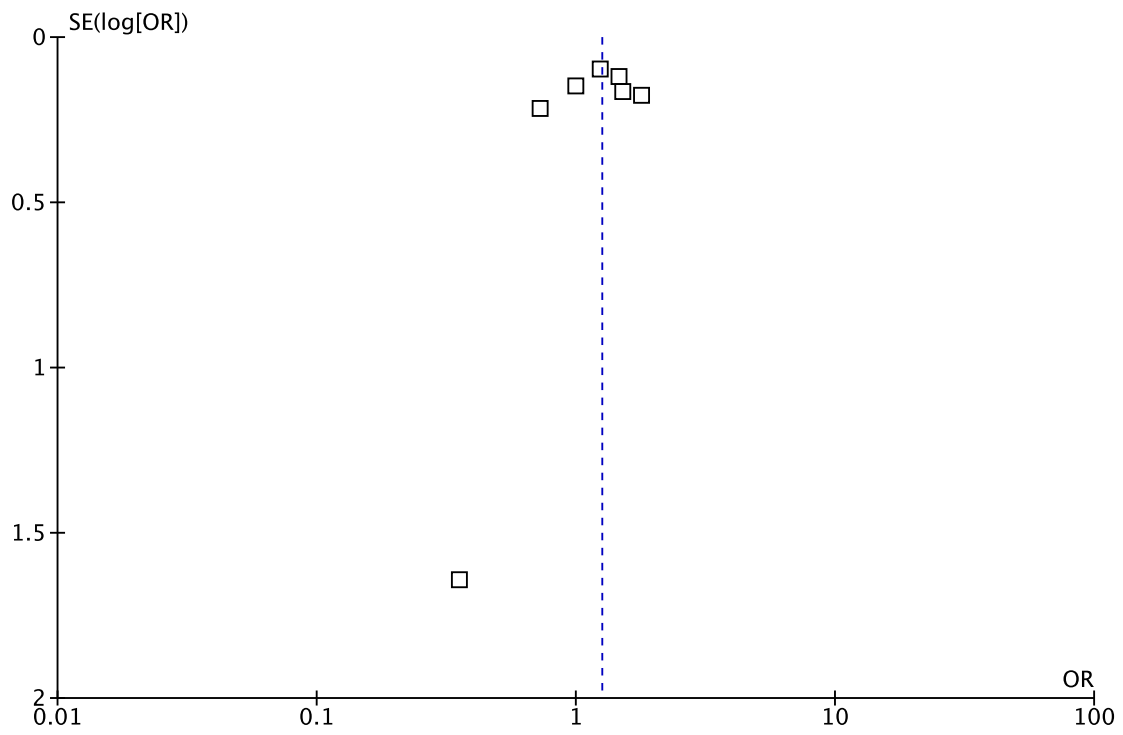

Neoadjuvant chemoradiotherapy vs. neoadjuvant radiotherapy:

*Overall survival*

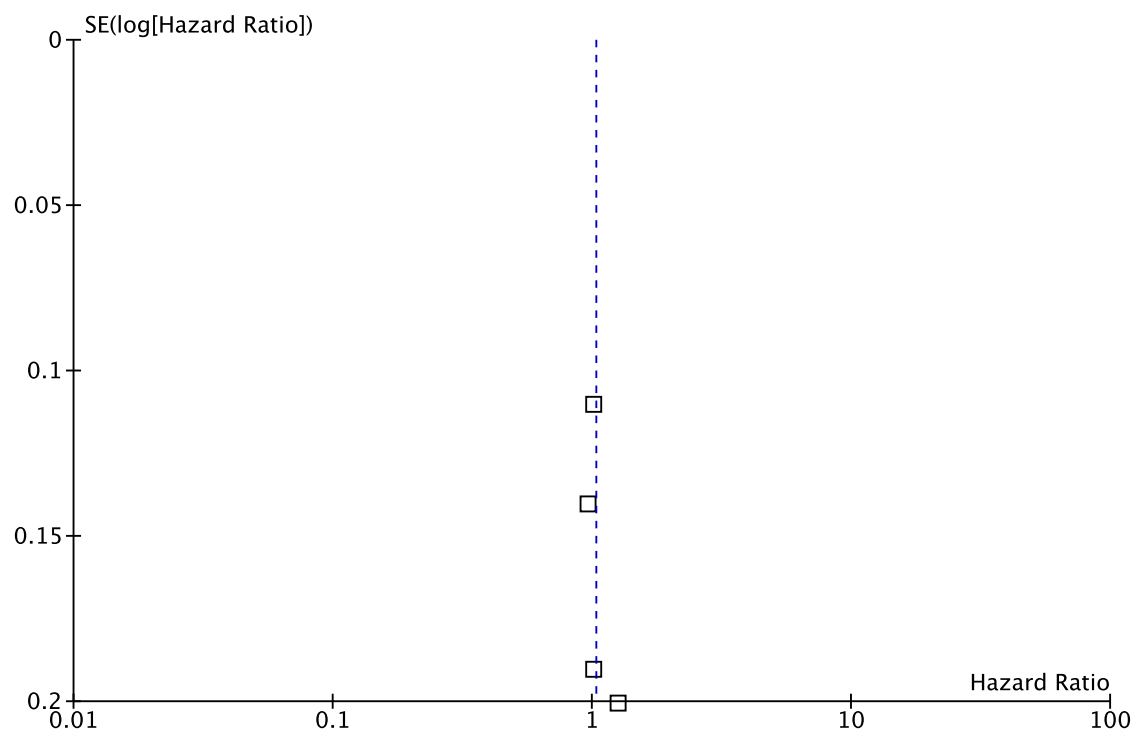

*Disease-free survival*

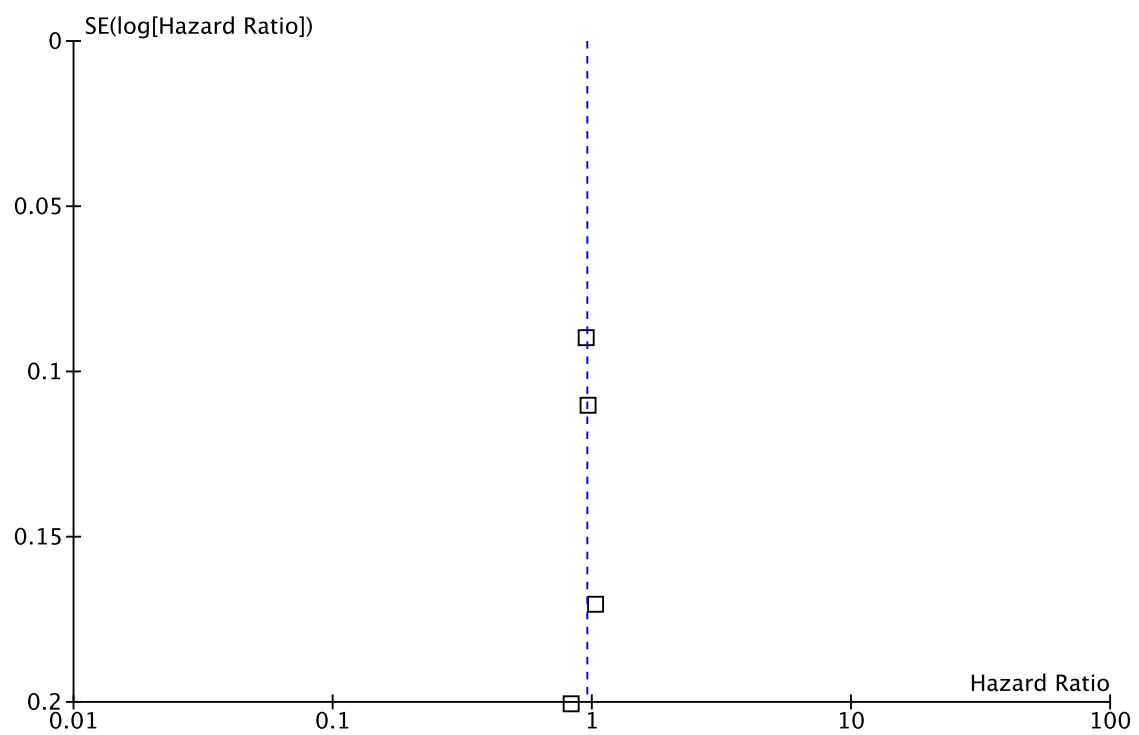

### Local recurrence-free survival

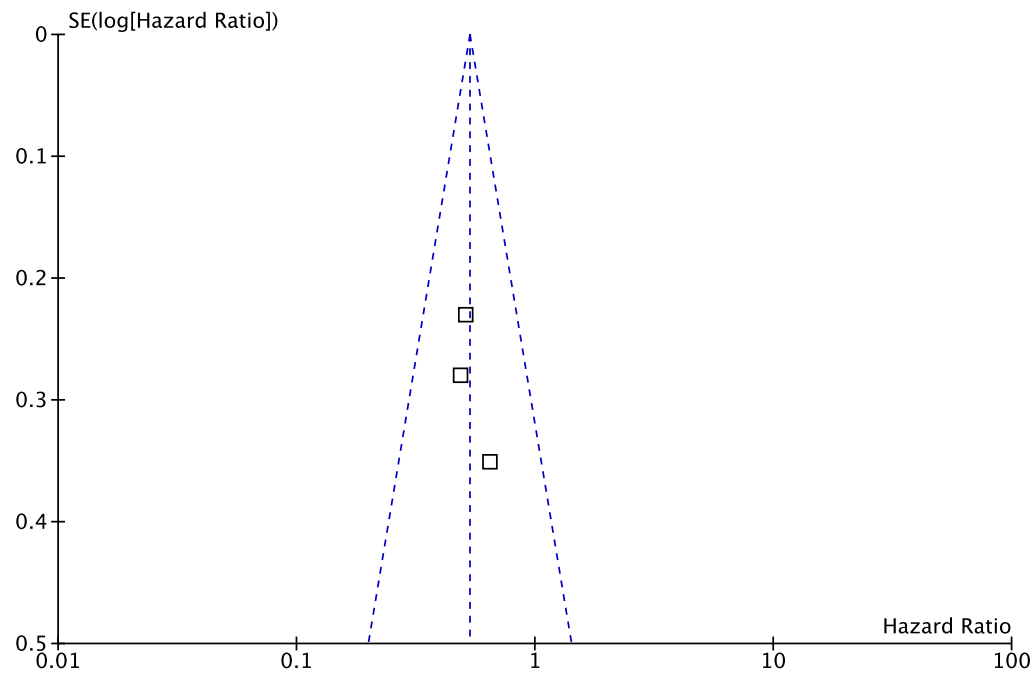

### Perioperative mortality

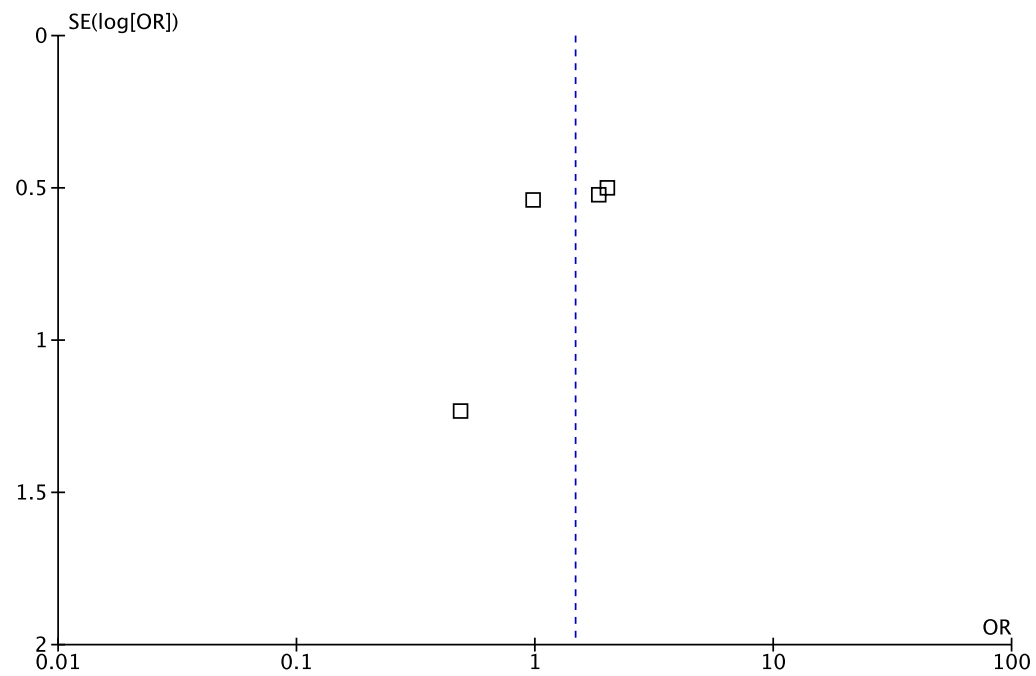

*Perioperative morbidity*

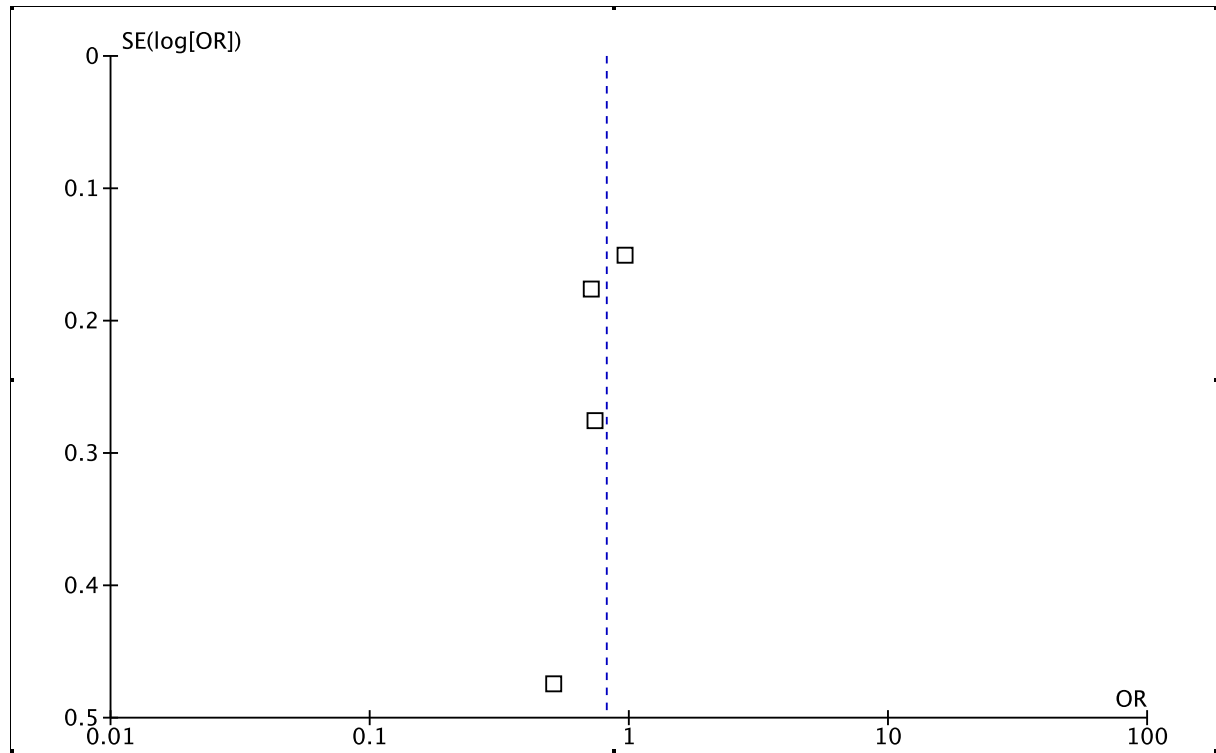

**References:**

1. Egger M, Davey SG, Schneider M et al. Bias in meta-analysis detected by a simple, graphical test. *BMJ* 1997;315:629-634.
2. Sterne JA, Egger M, Smith GD. Systematic reviews in health care: Investigating and dealing with publication and other biases in meta-analysis. *BMJ* 2001;323:101-105.
